# Supplementary material for: Development and validation of a new questionnaire appropriate to assess respiratory symptoms in current and former smokers without chronic obstructive pulmonary disease: The Respiratory Symptom Questionnaire (RSQ)
Source: Research Square preprint supplement (doi:10.21203/rs.3.rs-1297115/v1), 2022-01-28
Supplement: Supplementary file 1 [file 4498b532098171543de97602.docx]

**Additional File 1**

**METHODS**

**Phase 1: Drafting the Initial Questionnaire**

Content for the initial RSQ was generated based on: (1) review of relevant literature, including existing validated respiratory questionnaires, and (2) subject matter expert (SME) input. Published literature, existing respiratory symptom/cough questionnaires [5, 6, 8, 13, 14](ATSQ, SGRQ, CAT, CCQ, Obstructive Lung Disease in Northern Sweden Questionnaire [OLIN‑Q])[15], and national/international surveys (European Community Research Health Survey [ECRHS] [16], Population Assessment of Tobacco and Health [PATH] Wave 4) were reviewed to identify potentially appropriate item content (i.e., mild to moderate respiratory symptoms). In parallel, input regarding RSQ content was sought from SMEs, including a medical doctor with expertise in tobacco product research (*n*=1), pulmonologists (*n*=5), psychometricians (*n*=2), and a clinical study consultant with experience in collecting and analyzing respiratory symptom data. SME feedback was used to iteratively modify the symptom list and to draft the initial questionnaire (instructions, items, response options).

The initial questionnaire was drafted in accordance with principles outlined by prominent research organizations [17, 18] and FDA guidance/draft guidance [19, 20]. For example, double-barreled questions were avoided, and special attention was paid to generating items that were not likely to be vulnerable to ceiling/floor effects, identifying the most appropriate recall period and response scale, and the questionnaire’s reading level. Mode of administration, including usability on a small screen for electronic administration, was also considered during instrument development. After numerous refinements based on SME feedback, the initial 5-item questionnaire proceeded into cognitive testing. This initial questionnaire included items pertaining to cough throughout the day, morning cough with phlegm, shortness of breath, impairment in physically strenuous daily activities due to breathing, and wheezing.

**Phase 2: Cognitive Interviews**

Next, the draft questionnaire was evaluated through individual semi-structured cognitive debriefing interviews utilizing a retrospective probing technique to determine whether: the items and instructions were understood as intended, recall period was appropriate, response categories were perceived as meaningfully different and appropriately granular, items were perceived as applicable and not redundant, and that no important content was missing. Participant feedback obtained through cognitive interviews was used to rectify any potential sources of confusion or response error in the questionnaire, to modify item content to enhance relevance and meaningfulness to participants, and to provide evidence of content validity.

***Procedures – Phase 2***

Following informed consent, participants were asked to complete the electronic draft questionnaire independently via screenshare while the interviewer observed and noted any behavioral observations (e.g., changing an answer multiple times, taking an unusual amount of time to answer a question)[[1]](#footnote-1). Mode and method of questionnaire completion (i.e., participants completed the questionnaire on an electronic platform independently) during the cognitive interviews mimicked the questionnaire’s intended mode and method of administration to enhance realism and generalizability. Next, following the semi-structured interviewing guide, the interviewer reviewed the questionnaire and the participant’s responses with the participant to gather feedback on the instructions, items, and response options. This interviewer guide included general (e.g., *How did you arrive at your answer? Why did you select [participant’s response] instead of [adjacent response option]? In your own words, what is this question asking?*) and specific probes (e.g., *What do they mean by “wheezing or whistling in your chest”? What is meant by “phlegm or mucus”?*) to evaluate comprehension, retrieval, judgement, and response. Interviewers deviated from the guide as needed to fully understand the participant’s experience with the questionnaire and to identify opportunities for improvement. Interviewers also probed around the recall period, whether content was redundant, and whether any important content was missing.

Two interviewers, experienced with cognitive debriefing, completed the 49 interviews in three waves (Wave 1 *n* =13, Wave 2 *n* =17, Wave 3 *n* =19). Conducting interviews in waves allowed for revisions to the questionnaire based on participant feedback between waves, and then testing of the revised content in subsequent waves.

Cognitive interviews lasted approximately 30 minutes and participants were compensated $65 for their time. Interviews were audio recorded and transcribed. An informal saturation table was completed in real-time to facilitate identification of themes and to evaluate saturation. These themes were used to guide questionnaire revisions between waves.

Although saturation was reached during both wave 1 and 2, a third wave of interviews was conducted to expand representation in the first two waves of individuals (1) identifying as Hispanic/Latino, (2) with low educational attainment (high school or less), and (3) with low health literacy to verify that the questionnaire content was understood as intended and not differentially interpreted by these audiences. Wave 3 included 19 interviews with Smokers (n=10) and Switchers (n=9) from these demographic groups (Hispanic/Latino *n* =7; low educational attainment *n* =7; low health literacy *n*=5).

***Participants – Phase 2***

Cognitive interviewing participants represented the intended end-users of the questionnaire: (1) cigarette smokers (Smokers; *n* =25) and (2) former smokers who switched completely from cigarettes to e-cigarettes (Switchers; *n* =24). Smokers were defined as: having smoked 100+ cigarettes, smoking for 10+ years, currently smoking “every day” or “some days,” and had not used e-cigarettes in the past 30 days. Switchers were former smokers (smoked 100+ cigarettes, smoked 10+ years, had not smoked in the past 6 months) who were current established e-cigarette users (have used e-cigarettes on a “regular basis,” used e-cigarettes for 6+ months, currently using e-cigarettes “every day” or “some days”).

Participants were recruited from different locations around the United States from opt-in panels maintained by a consumer-research vendor (Schlesinger Group, Iselin, Woodbridge Township, NJ). Recruitment used soft target quotas to recruit a diverse sample of participants with respect to sex, age, race/ethnicity, education attainment, and health status, as well as participants with low health literacy based on the Single Item Literacy Screener (SILS)[21].

Inclusion criteria included being 31 years of age or older[[2]](#footnote-2), residing in the United States, and having access to a working phone and tablet/computer/laptop with a camera and internet access for purposes of completing the interview. Individuals who were current or former employees or who had a first-degree relative currently or formerly employed by the tobacco or e-cigarette industry, individuals in litigation or who had a household member in litigation with a tobacco or e-cigarette company, and individuals who had participated in marketing research pertaining to tobacco or e-cigarettes in the past month were excluded from participation.

A summary of Phase 2 participant sociodemographic characteristics is provided in Table 1.

Table 1 Participant Sociodemographic Characteristics: Phase 2 (N=49)

| Characteristic | n (%) |
| --- | --- |
| Gender |  |
| Male | 27 (55.1) |
| Female | 22 (44.9) |
| Age |  |
| 31-40 | 18 (36.7) |
| 41–60 | 22 (44.9) |
| 61-69 | 9 (18.4) |
| Race |  |
| White | 32 (65.3) |
| African American | 14 (28.6) |
| Other | 5 (10.2) |
| Hispanic | 10 (20.4) |
| Education Level |  |
| High school or below | 11 (22.4) |
| Some College and beyond | 38 (77.6) |
| Low Health Literacy | 8 (16.3) |

*Table 1 legend:* Summary of Phase 2 participants’ sociodemographic characteristics. Participants could endorse multiple races. Low Health Literacy is defined as participants who endorsed “sometimes,” “often,” or “always” on the SILS.

**Phase 3: Quantitative Psychometric Evaluation**

***Procedures – Phase 3***

The RSQ was administered as part of an online survey to adult tobacco users and nonusers, including roughly equal numbers of Smokers, Switchers, and Former Smokers (no tobacco product use in 6+ months). The online survey included a participant screener (which included the SILS to identify participants with limited reading ability), informed consent, and the main study questionnaire (health status, RSQ). Health status was assessed with 3 questions: (1) global health status (item 1 from the 36-Item Short Form Survey; SF-36)[22], (2) diagnostic status (Has a doctor, nurse, or other health professional told you that you have any of the following? Choose all that apply. *Response options[[3]](#footnote-3):* allergies, asthma, chronic bronchitis, chronic obstructive pulmonary disease (COPD), emphysema, obesity, congestive heart failure, other lung or respiratory condition, none of the above, don’t know; modified from PATH [23] (Wave 4), and (3) current illness (In the past 30 days, have you been sick with a cold or flu-like symptoms?). The global health status and diagnostic status items were incorporated for purposes of evaluating validity of the RSQ, while the current illness question was intended to exclude participants who were acutely ill when evaluating test-retest reliability of the RSQ scores over time. The diagnoses included in the diagnostic status item were selected because they are respiratory diseases (e.g., COPD) or because they share overlapping symptoms with respiratory diseases (e.g., individuals with obesity or congestive heart failure may experience shortness of breath; coughing and/or difficulty breathing are often characteristic of asthma; wheezing is a common symptom of allergies, etc.). Therefore, it was expected that (1) RSQ scores would be higher among those with COPD or other respiratory symptom-related diseases than among those without such conditions, and that (2) RSQ scores would be uniquely associated with a diagnosis of COPD above and beyond these other respiratory symptom-related diagnoses.

Approximately 1 week later, participants who completed the survey were re-contacted and asked to complete the RSQ a second time (“Time 2 Survey”) for purposes of evaluating test-retest reliability. Invitations for the Time 2 Survey were emailed to participants who completed the Time 1 Survey on a rolling basis as their 1-week post-survey completion date approached; once the target sample size was reached, no additional invitations were sent[[4]](#footnote-4).

Panelists were compensated for their time with panel points.

***Sample Size Determination – Phase 3***

For the Phase 3, it was determined that a sample size of *N*=600 would be sufficient to generate reliable estimates (i.e., approximately 20 participants per parameter[24, 25]) within the context of a graded response model (GRM)[26].

To determine the necessary number of completes for the Time 2 Survey (test-retest reliability analysis), a power analysis was conducted using PASS 2020 (https://www.ncss.com/software/pass/). Using an *F*-test and setting alpha at 0.05, it was determined that a sample size of *n*=100 completes would achieve 80% power to detect a significant difference between an intraclass correlation (ICC) of 0.80 and 0.69.

***Participants – Phase 3***

Smokers, Switchers, and Former Smokers were recruited from different locations (urban/rural) around the United States from opt-in panels maintained by Kantar Profiles (Bridgewater, NJ). Soft target quotas were used to ensure a diverse sample of participants with respect to sex, age, race/ethnicity, education attainment, and health status, and health literacy status. Inclusion/exclusion criteria were similar to Phase 2 (i.e., must be 31+ years of age, residing in the US, with access to device with internet access to complete the survey; could not be or have a first-degree relative who is a current/former employee of the tobacco or e-cigarette industry, could not be or have a household member in litigation with a tobacco or e-cigarette company, could not have participated in marketing research pertaining to tobacco or e-cigarettes in the past 1 month), except that participants did not need to have access to a working phone and a device with a camera to participate.

In total, 55,572 panelists were invited to participate in Phase 3. Of the 14,158 who started the Recruitment Screener, 12,251 failed and 1,907 passed the screener; the first 610 panelists who passed the screener were consented and enrolled in the study while the remaining 1297 were over quota and not enrolled. All 610 participants started and completed the Phase 3 survey, and no participants were removed during data verification/cleaning. Therefore, the final study sample included *N*=610 participants: *n*=202 Smokers, *n*=208 Switchers, and *n*=200 Former Smokers.

Phase 3 participant characteristics are presented in Table 2. Approximately half (46.7%) of participants endorsed one or more diagnoses on the diagnostic status screening item, with 17.0% of participants reporting a diagnosis of COPD. Most frequently, participants rated their health as “good” (40.5%) on the global health item, with few participants describing their health as “excellent” (4.4%) or “poor” (4.8%). Per the study requirements, all participants reported having smoked for at least 10 years, with a mean smoking history of 32.9 (*SD*=14.4) years. On average, Smokers reported having smoked for 41.9 years (*SD* = 11.7), while Switchers and Former Smokers smoked for approximately 28 years (*M*=28.8, *SD* = 13.8; *M*=28.0, *SD* = 13.2, respectively). Not surprisingly, Switchers were on average younger than Smokers and Former Smokers (*M*=54.6 vs. *M* =65.0 and *M* =67.6, respectively), as use of ENDS is more common in younger cohorts [27, 28]. The vast majority of Smokers and Switchers reported daily use of cigarettes (93.1%) or ENDS products (92.8%), respectively. Most Switchers reported having used ENDS for more than 1 year (89.9%), while only 10.1% reported having switched from cigarettes to ENDS more recently. Switchers reported currently using a variety of ENDS brands.

| **Table 2** Participant Sociodemographic Characteristics: Phase 3 (*N*=610) | | | | |
| --- | --- | --- | --- | --- |
| Variable | Total Sample  *N*=610 | Smokers (*n*=202) | Switchers  (*n*=208) | Former Smokers  (*n*=200) |
|  | *n* (%) | *n* (%) | *n* (%) | *n* (%) |
| Gender |  |  |  |  |
| Female | 365 (59.8%) | 139 (68.8%) | 118 (56.7%) | 108 (54.0%) |
| Male | 244 (40.0%) | 62 (30.7%) | 90 (43.3%) | 92 (46.0%) |
| Other | 1 (0.2%) | 1 (0.5%) | 0 (0.0%) | 0 (0.0%) |
| Race |  |  |  |  |
| White/Caucasian | 569 (93.3%) | 190 (94.1%) | 190 (91.3%) | 189 (94.5%) |
| Black/African American | 31 (5.1%) | 10 (5.0%) | 11 (5.3%) | 10 (5.0%) |
| Asian | 7 (1.1%) | 1 (0.5%) | 5 (2.4%) | 1 (0.5%) |
| Native Hawaiian/Pacific Islander | 3 (0.5%) | 0 (0.0%) | 2 (1.0%) | 1 (0.5%) |
| American Indian/Alaskan Native | 17 (2.8%) | 5 (2.5%) | 8 (3.8%) | 4 (2.0%) |
| Other | 8 (1.3%) | 1 (0.5%) | 3 (1.4%) | 4 (2.0%) |
| Ethnicity - Hispanic | 13 (2.1%) | 2 (1.0%) | 8 (3.8%) | 3 (1.5%) |
| Education |  |  |  |  |
| Less than high school – high school graduate | 175 (28.7%) | 66 (32.7%) | 53 (25.5%) | 56 (28.0%) |
| Some college + | 435 (71.3%) | 136 (67.3%) | 155 (74.5%) | 144 (72.0%) |
| Diagnostic Status |  |  |  |  |
| Allergies | 173 (28.4%) | 62 (30.7%) | 56 (26.9%) | 55 (27.5%) |
| Asthma | 39 (6.4%) | 11 (5.4%) | 11 (5.3%) | 17 (8.5%) |
| COPD/emphysema/chronic bronchitis | 104 (17.0%) | 43 (21.3%) | 31 (14.9%) | 30 (15.0%) |
| Obesity | 80 (13.1%) | 18 (8.9%) | 25 (12.0%) | 37 (18.5%) |
| Congestive heart failure | 16 (2.6%) | 3 (1.5%) | 4 (1.9%) | 9 (4.5%) |
| Age |  |  |  |  |
| Min, Max | 31, 88 | 32, 85 | 31, 82 | 38, 88 |
| Mean (SD) | 62.3 (12.4) | 65.0 (9.4) | 54.6 (13.7) | 67.6 (9.5) |

*Table 2 legend:* Sociodemographic characteristics and self-reported diagnostic status among Phase 3 participants. Participants could endorse multiple races and diagnoses. Low Health Literacy is defined as participants who endorsed “sometimes,” “often,” or “always” on the SILS.

SD = Standard deviation

In total, 145 participants who completed the Time 1 survey completed the Time 2 survey. One-hundred and twenty-eight of these participants who did not report being sick with a cold or flu-like symptoms at either timepoint comprised the retest sample for evaluating test-retest reliability.

***Analytic Plan***

Psychometric analysis included both classical and item response theory (IRT) approaches. Analyses were conducted in SAS 9.4 [29], Mplus version 8.6 [30], and SPSS version 28 [31].

***Evaluating IRT Model Fit and Assumptions******.*** A 2-parameter IRT model appropriate for polytomous items, the graded response model (GRM)[26], was fit in Mplus. GRM model fit was evaluated through 3 types of fit statistics[32]: absolute (chi-square fit statistic, standardized root mean square residual; SRMR), comparative (comparative fit index [CFI]), and parsimony corrected (root mean square error of approximation [RMSEA]). Commonly accepted criteria for reasonable model [33] fit include: a CFI value close to .95 or greater, RMSEA close to .06 or below, and SRMR close to .08 or below.

The GRM’s assumption of ordinality of response categories was empirically evaluated by fitting a generalized partial credit model (GPCM)[34, 35] in Mplus. The GPCM is a 2-paramter IRT model which allows for examination of observed category averages and category thresholds (the trait level at which endorsing adjacent response categories are equally probable); if ordered, this provides empirical support that the response option scale is functioning appropriately. Next, to evaluate the GRM’s assumption of unidimensionality, a Monte Carlo simulation (parallel analysis) with 10,000 randomly generated datasets (permutations of the raw dataset, not assuming a normal distribution) was conducted using a principal components analysis (PCA) extraction method. Specifically, eigenvalues derived from the PCA were compared against the 95th percentile of the distribution of the randomly generated eigenvalues to identify the number of significant factors.

***Difficulty and Item Discrimination.*** Difficulty and discrimination are the two parameters estimated in a 2-parameter IRT model. Difficulty reflects the trait level at which a participant has an equal probability of endorsing a particular response option compared to the “higher” response options (e.g., Never vs. Rarely/ Occasionally/ Most days/ Every day)[36]. As the RSQ has 5 response categories, 4 difficulty parameters were estimated per item from the GRM. Having difficulties which cover a range of thetas can increase measurement precision (see Test Information and Reliability).

Discrimination is the second parameter estimated in a 2-parameter model. Discrimination speaks to the relevance of the item to the latent trait being estimated, and the items’ ability to distinguish between respondents with different trait levels. Within the context of the GRM, a single discrimination parameter is generated per item.

***Test Information and Reliability.*** Next, the RSQ’s measurement precision was evaluated by generating a test information function (TIF) from the GRM. To facilitate interpretation of the TIF, this function was converted to a function depicting reliability estimates (range 0 to 1) for the RSQ at different trait levels by dividing information by information + 1[37].

***Test-Retest Reliability (Stability)****.* Stability of the RSQ was evaluated by calculating an absolute ICC (two-way mixed effects model) between RSQ scores from the Time 1 and Time 2 Surveys among participants who completed the RSQ at both time points. Participants who reported being sick with cold or flu-like symptoms at either timepoint were excluded from this analysis, as these illnesses could account for true change in respiratory symptom scores.

***Differences Between Study Groups as a Proxy for Ability to Detect Change.*** Smoking is known to produce respiratory symptoms, which resolve after stopping smoking [38]. Given the study design, it was not possible to evaluate the sensitivity of the RSQ in detecting true changes in smokers’ respiratory symptoms over time following smoking abstention. Instead, the analysis used a between-subjects design analogous to a case-control design, using differences in respiratory symptom scores between Smokers and Former Smokers as a proxy for detecting change over time related to abstaining from smoking. It was anticipated that there would be significant differences in respiratory symptom scores between these groups, whereby Smokers would have higher respiratory symptom scores than Former Smokers. Differences between Smokers and Former Smokers’ scores were evaluated via an independent samples *t*-test.

***Exploratory analysis: Additional differences between study groups.*** While research supports a reduction in respiratory symptoms following smoking abstention, few studies have prospectively evaluated how smokers’ respiratory symptoms/functioning are affected by complete switching from cigarettes to ENDS and some of these studies have yielded inconsistent findings[12]. Therefore, evaluation of differences between Smokers’ and Switchers’ RSQ scores were not regarded as a basis for evaluating the RSQ’s ability to detect known differences between groups (as was done with the Smoker and Former Smoker groups). Instead, differences between (1) Smokers and Switchers and (2) Switchers’ and Former Smokers’ RSQ scores were evaluated through an exploratory analysis via independent samples *t*-tests.

***Convergent Validity.*** Convergent validity was evaluated in two ways. First, a Spearman correlation was calculated between RSQ scores and self-reported global health status. Given the various factors in addition to respiratory symptoms which may impact global health status, a weak correlation was anticipated, whereby greater respiratory symptom frequency would correspond with worse self-reported global health. Second, as evidence of known-groups validity, RSQ scores were evaluated by diagnostic status using independent samples *t*-tests. It was anticipated that RSQ scores would be significantly lower among (1) participants without a respiratory symptom-relevant diagnosis (i.e., allergies, asthma, chronic bronchitis, COPD, emphysema, obesity, congestive heart failure) when compared to participants who reported one or more respiratory symptom-relevant diagnoses, and (2) participants without vs. with COPD.

***Exploratory Analysis: Association Between RSQ and COPD Symptoms.*** While the RSQ is not intended to function as a diagnostic tool for COPD, it was developed to capture respiratory symptoms among current or former smokers (Switchers) who may be experiencing respiratory symptoms related to the eventual development of pulmonary disease, including COPD. Consequently, it is logical that COPD diagnostic status and RSQ scores should be related above and beyond (after controlling for) other respiratory symptom-related diagnoses. Data corroborating this hypothesis would provide support for the RSQ’s ability to capture respiratory symptoms specifically related to potential COPD as opposed to other potentially relevant diseases. To evaluate this hypothesis, a linear regression was estimated with self-reported non-COPD diagnoses (i.e., asthma, allergies, congestive heart failure, obesity) as covariates, and self-reported COPD as the focal independent variable, and RSQ scores as the dependent variable.

**RESULTS**

**Phase 2: Cognitive Interviews**

Themes identified from the first 13 interviews (Wave 1) were used to guide questionnaire modifications between Waves 1 and 2 in conjunction with SME input. For example, probing revealed that several participants responded to Item 2 “Cough Frequently” based on frequency of coughing during a typical day as opposed to the number of days in the past 30 days when they experienced cough throughout the day. To rectify this response error, “past 30 days” was underlined in both the instructions and item stem, and the response options were modified to specify number of days (e.g., “Rarely (1-5 days)”). These revisions appeared to be effective, as no participants in Wave 2 made this response error. Further, participants indicated that there was alignment with the response option descriptor (e.g., “Rarely”) and the corresponding number of days (e.g., “1-5 days”).

During Wave 1, several participants endorsed Item 3 (“Shortness of Breath”) because of exercise. Therefore, this item was revised to emphasize difficulty breathing during normal daily activities where shortness of breath is not expected and thus may be indicative of respiratory difficulties. Examples of “normal daily activities,” generated from participant feedback during Wave 1, were also added to decrease the likelihood that participants would misunderstand this item to be referring to activities such as exercise, where shortness of breath is expected. Revisions made following wave 1 appeared to be effective, and no additional revisions were warranted based on participant feedback obtained during wave 2 interviews (*n*=17).

Of note, the RSQ asks respondents to consider the number of days in the past 30 days that they experienced various respiratory symptoms. The decision to assess frequency of respiratory symptoms instead of using another metric such as perceived severity of symptoms was made based on review of the literature (including existing respiratory symptom questionnaires) and conversations with subject matter experts. Additionally, 30 days was chosen as the recall period as shorter time frames such as the past day or week may not be representative of the respondent’s typical level of respiratory symptoms and selecting a longer timeframe such as 60 days could result in recall bias. Feedback from cognitive interviews indicated that participants did not have trouble recalling their symptoms over the past 30 days.

Although saturation was reached during both wave 1 and 2, a third wave of interviews was conducted to verify that the RSQ was understood as intended and not differentially interpreted by individuals (1) identifying as Hispanic or Latino, (2) with low educational attainment (high school or less), and (3) with low health literacy. Wave 3 participants generally understood the RSQ as intended; they were able to correctly rephrase the items in their own words and provide an explanation behind their response selection that was consistent with the intended use of the response options. However, a few participants commented that Item 3 “Shortness of Breath” and Item 4 “Easily Winded” had similar content, and some had trouble articulating the distinction between them (i.e., *interference* in daily activities due to shortness of breath vs. the *presence* of shortness of breath) when probed. Future research may explore whether a slight modification (e.g., underlining “makes it difficult to do normal daily activities”) to the RSQ may help emphasize the intention of Item 3 “Shortness of Breath”, but the items were considered appropriate in their current form.

**Phase 3: Quantitative Psychometric Evaluation**

**Table 3** Thresholds and observed averages for the RSQ items’ response option scales generated from the GPCM

|  |  | Item 1  Morning Cough | Item 2 Cough Frequently | Item 3 Shortness of Breath | Item 4 Easily Winded | Item 5 Wheezing |
| --- | --- | --- | --- | --- | --- | --- |
| Thresholds | 1 | 0.222 | 0.192 | 0.779 | 0.113 | 1.083 |
| 2 | 0.751 | 1.078 | 3.149 | 2.999 | 2.099 |
| 3 | 1.043 | 1.589 | 4.953 | 4.997 | 3.230 |
| 4 | 1.935 | 2.145 | 7.347 | 7.406 | 3.637 |
| Observed Averages | Never | -0.471 | -0.521 | -0.690 | -0.776 | -0.452 |
| Rarely | 0.063 | 0.108 | 0.378 | 0.314 | 0.480 |
| Occasionally | 0.461 | 0.717 | 0.904 | 0.847 | 1.024 |
| Most days | 0.889 | 0.983 | 1.355 | 1.294 | 1.423 |
| Every day | 1.185 | 1.478 | 1.859 | 1.964 | 2.151 |

*Table 3 legend:* Thresholds and observed category averages are ordered, providing quantitative evidence of that the RSQ items’ response categories are functioning as expected. Note that response option category labels are abbreviated for purposes of displaying the data in Table 4. Response options for each item are: Never (0 days out of the last 30 days), Rarely (1-5 days), Occasionally (6-15 days), Most days (16-29 days), Every day (all 30 days out of the last 30


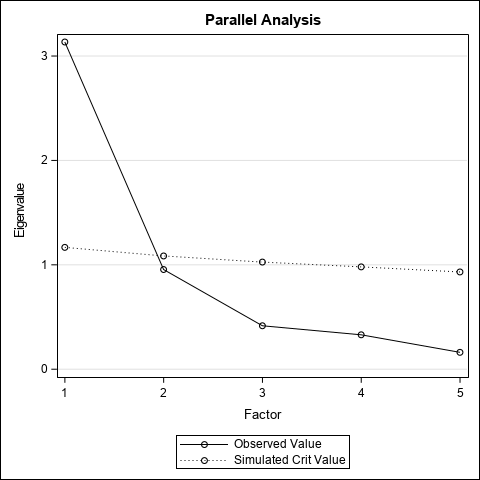


*Figure 1 title:*Scree plot

*Figure 1 legend:* Figure 1 depicts the eigenvalues generated from the parallel analysis (solid line) against the 95th percentile of the distribution of the randomly generated eigenvalues (dashed line). Only the first eigenvalue is higher than the distribution of randomly generated eigenvalues, providing evidence of unidimensionality.

**Administration and Scoring**

RSQ instructions, presented on a separate screen prior to Item 1, are “For the following questions, please think about your experiences in the past 30 days.” To facilitate administration on a small screen device, each RSQ item is administered on a separate screen with the following instructions on each screen: “Over the past 30 days, how often did you experience the following?” RSQ items are administered in a fixed order, consistent with item presentation in Table 3, and response option order is also fixed. The RSQ was developed and validated in electronic form, and electronic administration is recommended. Given the high correlation between the GRM-derived scoring and the raw scores observed here (*r* =.94) and the complexities associated with using scoring from a 2-parameter IRT model, it is recommended that researchers use the raw RSQ item scores to calculate a composite. A composite score is calculated by taking the average of the 5 RSQ items. If an item is missing, a composite should not be calculated.

1. Interviews took place during the COVID pandemic and therefore were conducted electronically. [↑](#footnote-ref-1)
2. This age requirement reflects current legal age to purchase tobacco products in the United States (21 years) plus 10 years to ensure a substantial smoking history (increasing the likelihood of participants experiencing some respiratory symptoms). [↑](#footnote-ref-2)
3. For purposes of analyses, participants reporting chronic bronchitis, emphysema, and/or COPD were collapsed into a single “COPD” group. [↑](#footnote-ref-3)
4. Participants who had received an invitation for the Time 2 Survey were able to complete the Time 2 Survey if they desired even after the target *n*=100 was reached, resulting in a slightly larger *n* than was targeted. [↑](#footnote-ref-4)
